# Supplementary material for: Sleep duration predicts cardiovascular outcomes: a systematic review and meta-analysis of prospective studies
Source: Oxford University Press journal article supplement (doi:10.1093/eurheartj/ehr007), 2011-02-07
Supplement: ehr007_Supplementary_Data.zip [file ehr007_Supplementary_Data.zip]

Archive with 1 entries (1 files):
- ehr007supp.pdf
